# Supplementary material
Source: PubMed Central journal article supplement (PMC3670694)
Supplement: NIHMS456447-supplement-1_si_001.pdf [file NIHMS456447-supplement-1_si_001.pdf]

**Table S1: Primers used in this study**

| Primer     | Sequence                                            | Description                       |
|------------|-----------------------------------------------------|-----------------------------------|
| prRPE-39   | 5'-CCTCTCGGTGGGCGGAGCTGGAAAGACCTC-3'                | Quikchange for S49A point mutant  |
| prRPE-39rc | 5'-GAGGTCTTTCCAGCTCCGCCACCAGAGAGG-3'                | Reverse complement for S49A       |
| prRPE-41   | 5'-GTATACTGTCCCGGGCCCAAGAGAAAGAGTAAAGG-3'           | Quikchange for Y74A point mutant  |
| prRPE-41rc | 5'-CCTTTACTCTTTCTCTTGGCGCCCCGGGACAGTATAC-3'         | Reverse complement Y74A           |
| prRPE-56   | 5'-GGAAGAGGCAGGGGGCGGAGCCCTACCTTATG-3'              | Quikchange for D99A point mutant  |
| prRPE-56rc | 5'-CATAAGGTAGGGCTCCGCCCTGCCTCTTCC-3'                | Reverse complement D99A           |
| prRPE-57   | 5'-CCATAAGGTAGGGCTCATTCCCTGCCTTCCCAG-3'             | Quikchange for D99N point mutant  |
| prRPE-57rc | 5'-CTGGGAAGAGGCAGGGAATGAGCCCTACCTTATGG-3'           | Reverse complement D99N           |
| prRPE-60   | 5'-GGGAAGAGGCAGGGGAAGAGCCCTACCTTATGG-3'             | Quikchange for D99E point mutant  |
| prRPE-60rc | 5'-CCATAAGGTAGGGCTCTTCCCCTGCCTTCCC-3'               | Reverse complement D99E           |
| prRPE-42   | 5'-GAGGCAGGGACGCGCCCTACCTTATG-3'                    | Quikchange for E100A point mutant |
| prRPE-42rc | 5'-CATAAGGTAGGGCGCGTCCCCTGCCTC-3'                   | Reverse complement E100A          |
| prRPE-53   | 5'-GGGAAGAGGCAGGGGACCAGCCCTACCTTATG-3'              | Quikchange for E100Q point mutant |
| prRPE-53rc | 5'-CATAAGGTAGGGCTGGTCCCCTGCCTTCCC-3'                | Reverse complement E100Q          |
| prRPE-61   | 5'-GAGGCAGGGACGACCCTACCTTATGGC-3'                   | Quikchange for E100D point mutant |
| prRPE-61rc | 5'-GCCATAAGGTAGGGTTCGTCCCCCTGCCTC-3'                | Reverse complement E100D          |
| prRPE-51   | 5'-CTCCCGAGGTTTTTATTCTTAATGACGGATTC AACACAGG-3'     | Quikchange for D138N point mutant |
| prRPE-51rc | 5'-CCTGTGTTGAAATCCGTCATTAAGAATAAAAACTCGGGAG-3'      | Reverse complement D138N          |
| prRPE-52   | 5'-CCCAGGTTTTTTATTCTTGACAATGGATTTCAACACAGGAACTCC-3' | Quikchange for D139N point mutant |
| prRPE-52rc | 5'-GGAGTTTTCTGTGTTGAAATCCATTGTCAAGAATAAAAACTCGGG-3' | Reverse complement D139N          |
| prRPE-45   | 5'-GAATTTATGTCCTTCCCCGCTCACTACGATTACTCGG-3'         | Quikchange for D260A point mutant |
| prRPE-45rc | 5'-CCGAGTAATCGTAGTGAGCGGGGAAGGACATAAATTC-3'         | Reverse complement D260A          |
| prRPE-46   | 5'-GAATTTATGTCCTTCCCCGATGCCTACGATTACTCGGATTTCCAC-3' | Quikchange for H261A point mutant |
| prRPE-46rc | 5'-GTGAAATCCGAGTAATCGTAGGCATCGGGGAAGGACATAAATTC-3'  | Reverse complement H261A          |
| prT7F      | 5'-TAATACGACTCACTATAGGG-3'                          | Construct Sequencing              |
| prT7R      | 5'-GCTAGTTATTGCTCAGCGG-3'                           | Construct Sequencing              |

**Table S2: Strains and plasmids used in this study**

| <i>E. coli</i><br>Strains | Relevant Genotype                                                                                                                                   | Source    |
|---------------------------|-----------------------------------------------------------------------------------------------------------------------------------------------------|-----------|
| C41(DE3)                  | F <sup>-</sup> <i>ompThsds<sub>B</sub> (r<sub>B</sub><sup>-</sup> m<sub>B</sub><sup>-</sup>)gal dcm</i> (DE3) $\Delta$ ( <i>srl-recA</i> )306::Tn10 | (1)       |
| Plasmids                  | Relevant Genotype                                                                                                                                   |           |
| pET21(b)                  | Expression vector, T7lac promoter, AmpR                                                                                                             | Novagen   |
| pRPE7                     | pET21(b) harboring <i>A. aeolicus lpxK</i>                                                                                                          | (2)       |
| pRPE53                    | pET21(b) harboring S49A point mutant of <i>A. aeolicus lpxK</i>                                                                                     | This work |
| pRPE36                    | pET21(b) harboring K51A point mutant of <i>A. aeolicus lpxK</i>                                                                                     | (2)       |
| pRPE37                    | pET21(b) harboring T52A point mutant of <i>A. aeolicus lpxK</i>                                                                                     | (2)       |
| pRPE38                    | pET21(b) harboring S53A point mutant of <i>A. aeolicus lpxK</i>                                                                                     | (2)       |
| pRPE55                    | pET21(b) harboring Y74A point mutant of <i>A. aeolicus lpxK</i>                                                                                     | This work |
| pRPE70                    | pET21(b) harboring D99A point mutant of <i>A. aeolicus lpxK</i>                                                                                     | This work |
| pRPE71                    | pET21(b) harboring D99N point mutant of <i>A. aeolicus lpxK</i>                                                                                     | This work |
| pRPE74                    | pET21(b) harboring D99E point mutant of <i>A. aeolicus lpxK</i>                                                                                     | This work |
| pRPE56                    | pET21(b) harboring E100A point mutant of <i>A. aeolicus lpxK</i>                                                                                    | This work |
| pRPE69                    | pET21(b) harboring E100Q point mutant of <i>A. aeolicus lpxK</i>                                                                                    | This work |
| pRPE75                    | pET21(b) harboring E100D point mutant of <i>A. aeolicus lpxK</i>                                                                                    | This work |
| pRPE39                    | pET21(b) harboring D138A point mutant of <i>A. aeolicus lpxK</i>                                                                                    | (2)       |
| pRPE67                    | pET21(b) harboring D138N point mutant of <i>A. aeolicus lpxK</i>                                                                                    | This work |
| pRPE40                    | pET21(b) harboring D139A point mutant of <i>A. aeolicus lpxK</i>                                                                                    | (2)       |
| pRPE68                    | pET21(b) harboring D139N point mutant of <i>A. aeolicus lpxK</i>                                                                                    | This work |
| pRPE59                    | pET21(b) harboring D260A point mutant of <i>A. aeolicus lpxK</i>                                                                                    | This work |
| pRPE60                    | pET21(b) harboring H261A point mutant of <i>A. aeolicus lpxK</i>                                                                                    | This work |

<sup>1</sup>Miroux B, Walker JE (1996) *J Mol Biol* 260:289-298

<sup>2</sup>Emptage RP, et al. (2012) *Proc Natl Acad Sci USA* 109:12956-61
